# Supplementary material
Source: PubMed Central journal article supplement (PMC3243622)
Supplement: emboj2011339s3.pdf [file emboj2011339s3.pdf]

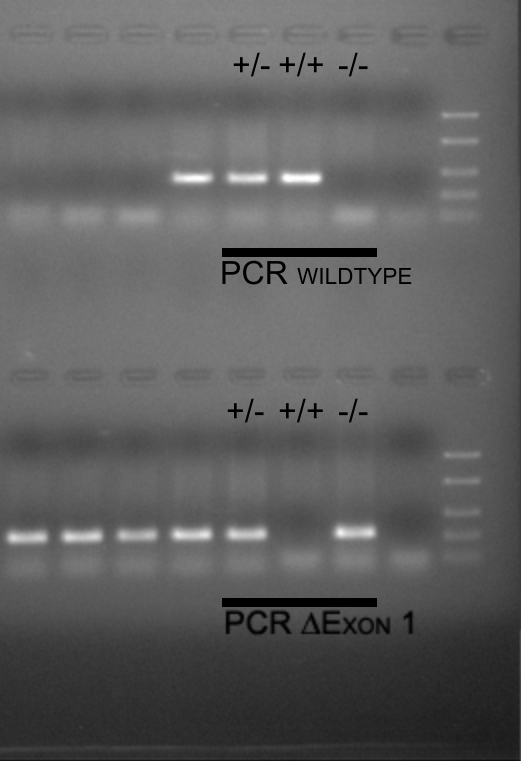

### Original data of Figure 1D

Genotyping PCRs on etidium bromide-stained agarose gel.

## Original Data Figure 6B

### Western blot analysis of IP#34, 29.11.2007

Sdpl-containing complexes were immunisolated from rat brain extracts.

Coimmunoprecipitated proteins were subsequently detected with dynamin-specific antibodies by Western blot.

The gels show start material followed by IP samples and the supernatants (SUP) of IPs with either unrelated IgGs ("IgG", control) or anti-syndapin I (anti-sdpl) antibodies.

Supernatants and IPs were analyzed for the presence of syndapin I (IP), dynamin I (CoIP), dynamin II (CoIP) and dynamin III (CoIP).

For Fig. 6B two and three intercalating samples, respectively, were omitted and only labelled lanes of the blots are shown.

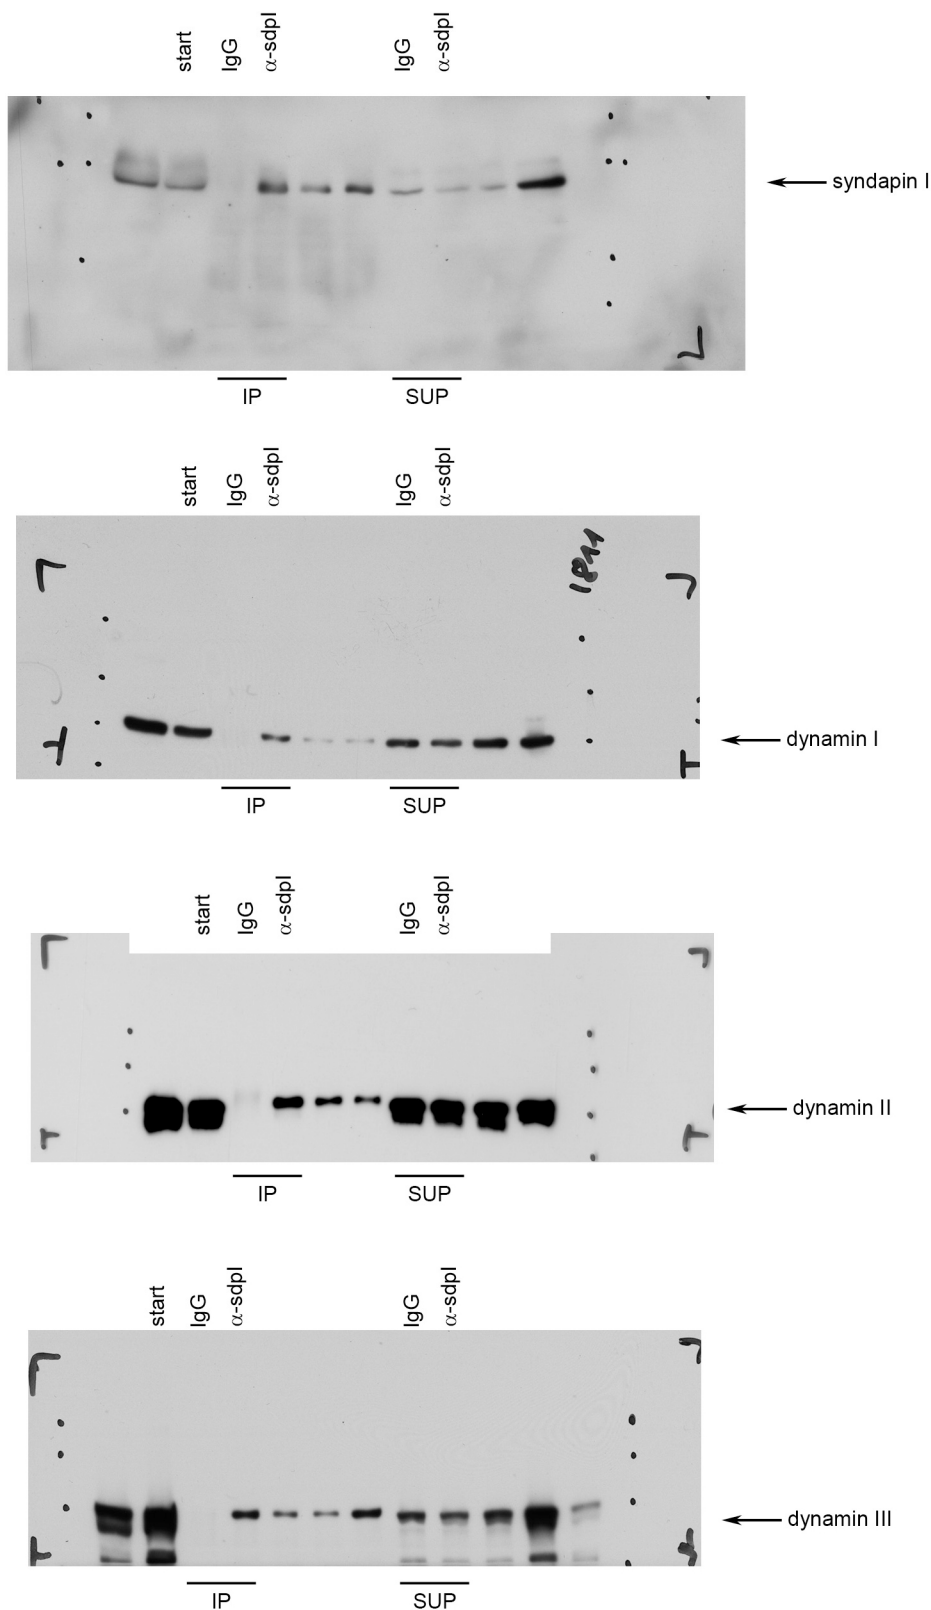

# Characterization of fusion proteins

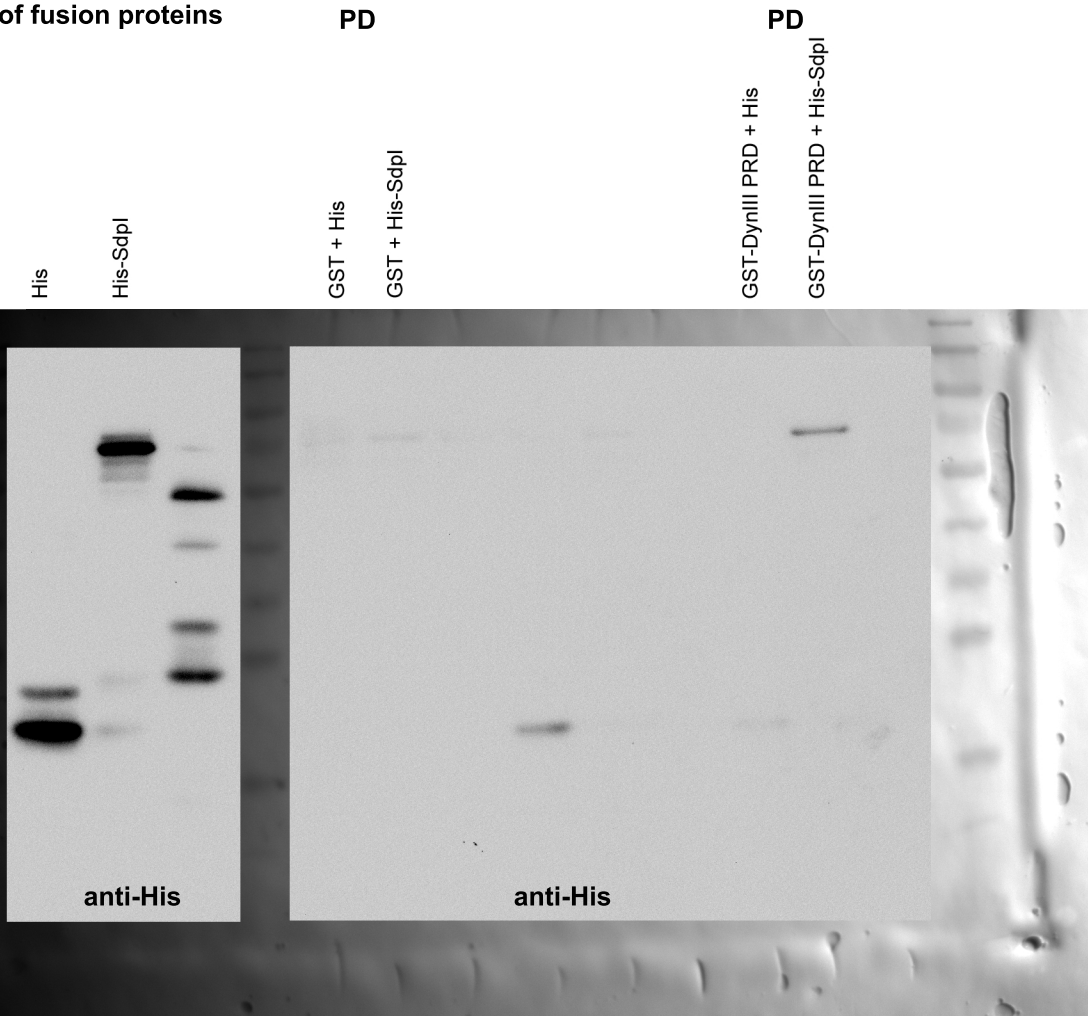

**Figure S7**

## Western blot analysis of pull down #42, 14.10.2009

GST solo bound to beads or GST-dynIII PRD were incubated with His solo or His-sdpl. Start material of His solo ("His") and His-Sdpl is shown on first 2 lanes. Bound proteins of GST incubated either with His ("GST + His") or with His-Sdpl ("GST + His-Sdpl") and GST-dynIII PRD incubated either with His solo ("GST-dynIII PRD + His") or with His-Sdpl ("GST-dynIII PRD + His-Sdpl") were analyzed on the same blot.

Only GST-dynIII PRD was able to sufficiently retard His-Sdpl during the stringend wash conditions prior to elution.

The file shows an overlay of the original ECL-signal arising from the blot detected with an Intas chemolumineszenz imager and a whitel light image of the blot membrane showing the lanes and the protein standard.
